# Supplementary material
Source: publisher figshare collection journal article supplement (https://gsajournals.figshare.com/ndownloader/files/26480465)
Supplement: Supplementary file 1 [file 26480465]

## Sheet: HiC_scaffolds_Seq_Len
Scaffold	Length (bp)		*32 major Hi-C scaffolds are highlighted
scaffold_1	90526592
scaffold_2	88429459
scaffold_3	85444037
scaffold_4	84129367
scaffold_5	83226387
scaffold_6	82828707
scaffold_7	80691562
scaffold_8	76314972
scaffold_9	68344370
scaffold_10	64291356
scaffold_11	61150316
scaffold_12	60751460
scaffold_13	55481105
scaffold_14	54636349
scaffold_15	52868405
scaffold_16	49809632
scaffold_17	47542702
scaffold_18	47493638
scaffold_19	46461921
scaffold_20	44109011
scaffold_21	43783547
scaffold_22	43511432
scaffold_23	42701168
scaffold_24	41998117
scaffold_25	41252767
scaffold_26	41045541
scaffold_27	40563000
scaffold_28	40340268
scaffold_29	39165350
scaffold_30	38767676
scaffold_31	37130194
scaffold_32	33340795
scaffold_33	17212459
scaffold_34	13831197
scaffold_35	10721458
scaffold_36	8679695
scaffold_37	8073615
scaffold_38	7677104
scaffold_39	7276052
scaffold_40	7011571
scaffold_41	6709559
scaffold_42	6203189
scaffold_43	5576853
scaffold_44	5548178
scaffold_45	5503561
scaffold_46	5494908
scaffold_47	5398225
scaffold_48	5393538
scaffold_49	5077371
scaffold_50	5046702
scaffold_51	4911823
scaffold_52	4766248
scaffold_53	4666618
scaffold_54	4481708
scaffold_55	4358290
scaffold_56	4338733
scaffold_57	4273263
scaffold_58	4270426
scaffold_59	4190053
scaffold_60	4173621
scaffold_61	4111970
scaffold_62	3883101
scaffold_63	3877140
scaffold_64	3818349
scaffold_65	3808513
scaffold_66	3803761
scaffold_67	3749551
scaffold_68	3725365
scaffold_69	3682168
scaffold_70	3495701
scaffold_71	3435023
scaffold_72	3431108
scaffold_73	3407098
scaffold_74	3288177
scaffold_75	3277785
scaffold_76	3272113
scaffold_77	3253093
scaffold_78	3237025
scaffold_79	3216528
scaffold_80	3199960
scaffold_81	3101361
scaffold_82	3095612
scaffold_83	3046641
scaffold_84	3022357
scaffold_85	2864942
scaffold_86	2807396
scaffold_87	2745910
scaffold_88	2737013
scaffold_89	2689235
scaffold_90	2645154
scaffold_91	2576183
scaffold_92	2549873
scaffold_93	2538092
scaffold_94	2537671
scaffold_95	2494405
scaffold_96	2491670
scaffold_97	2491153
scaffold_98	2489804
scaffold_99	2487114
scaffold_100	2463446
scaffold_101	2455971
scaffold_102	2366434
scaffold_103	2273226
scaffold_104	2167105
scaffold_105	2149922
scaffold_106	2134946
scaffold_107	2102605
scaffold_108	2068669
scaffold_109	2061567
scaffold_110	2046919
scaffold_111	2046640
scaffold_112	2041246
scaffold_113	2040450
scaffold_114	2003250
scaffold_115	1996191
scaffold_116	1995492
scaffold_117	1945081
scaffold_118	1894634
scaffold_119	1886234
scaffold_120	1874749
scaffold_121	1797194
scaffold_122	1747547
scaffold_123	1729038
scaffold_124	1718466
scaffold_125	1717275
scaffold_126	1711695
scaffold_127	1700088
scaffold_128	1688665
scaffold_129	1672354
scaffold_130	1654043
scaffold_131	1637420
scaffold_132	1617864
scaffold_133	1614824
scaffold_134	1613572
scaffold_135	1593524
scaffold_136	1561308
scaffold_137	1535696
scaffold_138	1514766
scaffold_139	1505715
scaffold_140	1504970
scaffold_141	1504147
scaffold_142	1488157
scaffold_143	1484391
scaffold_144	1484196
scaffold_145	1468864
scaffold_146	1454601
scaffold_147	1424958
scaffold_148	1361385
scaffold_149	1344047
scaffold_150	1335815
scaffold_151	1333805
scaffold_152	1325212
scaffold_153	1315946
scaffold_154	1308457
scaffold_155	1271572
scaffold_156	1258143
scaffold_157	1255147
scaffold_158	1224310
scaffold_159	1222286
scaffold_160	1164174
scaffold_161	1125905
scaffold_162	1112731
scaffold_163	1095120
scaffold_164	1079841
scaffold_165	1059334
scaffold_166	1059088
scaffold_167	1041425
scaffold_168	1033867
scaffold_169	996466
scaffold_170	975958
scaffold_171	943024
scaffold_172	941440
scaffold_173	928286
scaffold_174	926539
scaffold_175	926026
scaffold_176	922505
scaffold_177	920589
scaffold_178	918040
scaffold_179	904758
scaffold_180	903470
scaffold_181	889983
scaffold_182	888553
scaffold_183	888115
scaffold_184	882496
scaffold_185	882262
scaffold_186	880732
scaffold_187	879880
scaffold_188	871358
scaffold_189	858942
scaffold_190	856417
scaffold_191	844186
scaffold_192	842639
scaffold_193	828450
scaffold_194	827682
scaffold_195	817877
scaffold_196	813722
scaffold_197	802530
scaffold_198	791582
scaffold_199	789498
scaffold_200	766251
scaffold_201	749647
scaffold_202	737864
scaffold_203	736974
scaffold_204	735868
scaffold_205	721750
scaffold_206	714522
scaffold_207	713625
scaffold_208	708918
scaffold_209	707817
scaffold_210	677476
scaffold_211	674938
scaffold_212	673672
scaffold_213	666177
scaffold_214	655991
scaffold_215	631356
scaffold_216	624742
scaffold_217	622154
scaffold_218	614079
scaffold_219	586704
scaffold_220	585200
scaffold_221	581096
scaffold_222	579594
scaffold_223	571058
scaffold_224	570892
scaffold_225	569428
scaffold_226	566240
scaffold_227	560810
scaffold_228	555235
scaffold_229	553900
scaffold_230	516537
scaffold_231	512900
scaffold_232	510155
scaffold_233	501996
scaffold_234	494969
scaffold_235	493623
scaffold_236	481067
scaffold_237	476391
scaffold_238	471852
scaffold_239	444543
scaffold_240	431231
scaffold_241	418382
scaffold_242	409388
scaffold_243	407964
scaffold_244	404639
scaffold_245	393735
scaffold_246	390127
scaffold_247	381755
scaffold_248	371972
scaffold_249	369930
scaffold_250	360411
scaffold_251	357920
scaffold_252	355638
scaffold_253	354961
scaffold_254	346706
scaffold_255	344771
scaffold_256	331357
scaffold_257	326358
scaffold_258	322154
scaffold_259	317248
scaffold_260	310465
scaffold_262	304122
scaffold_261	303798
scaffold_263	294106
scaffold_264	292263
scaffold_265	285447
scaffold_266	281602
scaffold_267	277254
scaffold_268	277240
scaffold_269	275726
scaffold_270	270651
scaffold_271	267613
scaffold_272	264701
scaffold_273	263776
scaffold_274	262636
scaffold_275	262149
scaffold_276	261280
scaffold_277	258486
scaffold_278	257264
scaffold_279	256012
scaffold_280	255236
scaffold_281	254303
scaffold_282	251635
scaffold_283	248635
scaffold_284	244422
scaffold_285	242585
scaffold_286	242555
scaffold_287	241564
scaffold_288	238696
scaffold_289	234810
scaffold_290	233953
scaffold_291	233449
scaffold_292	230526
scaffold_293	227073
scaffold_294	226663
scaffold_295	225311
scaffold_296	224729
scaffold_297	220602
scaffold_298	217504
scaffold_299	217487
scaffold_300	215874
scaffold_301	211661
scaffold_302	211368
scaffold_303	209781
scaffold_304	209243
scaffold_305	208685
scaffold_306	205087
scaffold_307	204828
scaffold_308	203669
scaffold_309	203074
scaffold_310	199767
scaffold_311	198720
scaffold_312	196600
scaffold_313	195254
scaffold_314	194312
scaffold_315	191184
scaffold_316	189006
scaffold_317	186717
scaffold_318	185860
scaffold_319	184161
scaffold_320	183173
scaffold_321	177119
scaffold_322	175105
scaffold_323	171834
scaffold_324	171737
scaffold_325	169868
scaffold_326	167894
scaffold_327	165328
scaffold_328	165057
scaffold_329	161545
scaffold_330	159840
scaffold_331	158634
scaffold_332	157558
scaffold_334	155961
scaffold_333	155695
scaffold_335	155035
scaffold_336	154619
scaffold_337	152934
scaffold_338	152535
scaffold_339	152107
scaffold_340	150573
scaffold_341	150526
scaffold_342	150051
scaffold_343	149366
scaffold_344	149048
scaffold_345	147973
scaffold_346	147786
scaffold_347	146588
scaffold_348	145500
scaffold_349	145298
scaffold_350	144079
scaffold_351	143538
scaffold_353	141673
scaffold_352	141204
scaffold_354	140667
scaffold_355	140555
scaffold_356	140274
scaffold_357	138087
scaffold_358	137443
scaffold_359	137370
scaffold_360	137346
scaffold_361	136552
scaffold_362	135704
scaffold_363	135021
scaffold_364	134875
scaffold_365	134456
scaffold_366	134396
scaffold_367	132685
scaffold_368	132185
scaffold_369	130945
scaffold_370	130661
scaffold_371	130112
scaffold_372	128929
scaffold_373	128363
scaffold_374	128338
scaffold_375	127320
scaffold_376	126757
scaffold_377	125912
scaffold_378	125538
scaffold_380	125365
scaffold_379	124963
scaffold_381	124558
scaffold_382	123896
scaffold_383	122820
scaffold_384	122711
scaffold_385	122212
scaffold_387	121989
scaffold_386	121265
scaffold_388	120378
scaffold_389	120338
scaffold_390	119813
scaffold_391	118620
scaffold_392	116754
scaffold_393	116169
scaffold_394	114294
scaffold_395	113718
scaffold_396	113066
scaffold_397	112470
scaffold_398	111993
scaffold_399	111414
scaffold_400	110863
scaffold_401	110497
scaffold_402	110234
scaffold_403	108808
scaffold_404	107961
scaffold_405	107027
scaffold_406	106850
scaffold_407	106545
scaffold_408	106154
scaffold_409	106087
scaffold_410	105939
scaffold_411	105721
scaffold_412	105708
scaffold_413	105655
scaffold_414	105138
scaffold_415	105121
scaffold_416	104963
scaffold_417	104529
scaffold_418	104339
scaffold_419	103854
scaffold_420	103772
scaffold_421	103545
scaffold_422	103386
scaffold_423	102736
scaffold_424	102725
scaffold_425	102239
scaffold_426	102070
scaffold_427	101719
scaffold_428	101587
scaffold_429	101565
scaffold_430	101361
scaffold_431	101307
scaffold_432	101196
scaffold_433	99994
scaffold_434	99895
scaffold_435	99302
scaffold_436	98706
scaffold_437	98619
scaffold_438	98589
scaffold_439	98009
scaffold_440	97985
scaffold_441	97939
scaffold_442	97813
scaffold_443	97504
scaffold_444	97409
scaffold_445	97014
scaffold_446	96921
scaffold_447	96912
scaffold_448	96863
scaffold_449	96615
scaffold_450	96561
scaffold_451	96286
scaffold_452	96221
scaffold_453	96219
scaffold_454	94179
scaffold_455	93948
scaffold_456	93578
scaffold_457	93501
scaffold_458	93136
scaffold_459	93106
scaffold_460	93020
scaffold_461	92965
scaffold_462	92950
scaffold_463	92854
scaffold_464	91693
scaffold_465	91061
scaffold_466	90971
scaffold_467	90766
scaffold_468	90601
scaffold_469	90580
scaffold_470	90322
scaffold_471	90136
scaffold_472	89681
scaffold_473	89578
scaffold_474	89292
scaffold_475	88827
scaffold_476	88652
scaffold_477	88551
scaffold_478	88282
scaffold_479	87993
scaffold_480	87896
scaffold_481	87812
scaffold_482	87406
scaffold_483	86938
scaffold_484	86935
scaffold_485	86852
scaffold_486	86814
scaffold_487	86683
scaffold_488	86679
scaffold_489	86231
scaffold_490	86054
scaffold_491	85853
scaffold_492	85845
scaffold_493	85532
scaffold_494	85431
scaffold_495	85258
scaffold_496	85183
scaffold_497	84788
scaffold_498	84774
scaffold_499	84036
scaffold_500	83936
scaffold_501	83591
scaffold_502	83095
scaffold_503	83072
scaffold_504	83068
scaffold_505	82797
scaffold_506	82683
scaffold_507	82615
scaffold_508	82267
scaffold_509	82240
scaffold_510	82227
scaffold_511	82160
scaffold_512	82151
scaffold_513	82004
scaffold_514	81965
scaffold_515	81827
scaffold_516	81361
scaffold_517	81355
scaffold_518	81066
scaffold_519	81046
scaffold_520	80988
scaffold_521	80944
scaffold_522	80763
scaffold_523	80662
scaffold_524	80585
scaffold_525	80472
scaffold_526	80423
scaffold_527	79825
scaffold_528	79806
scaffold_529	79449
scaffold_530	79161
scaffold_531	79123
scaffold_532	78961
scaffold_533	78334
scaffold_534	78253
scaffold_535	78124
scaffold_536	77982
scaffold_537	77952
scaffold_538	77923
scaffold_539	77780
scaffold_540	77633
scaffold_541	77597
scaffold_542	77519
scaffold_543	77482
scaffold_544	77457
scaffold_545	77283
scaffold_546	77258
scaffold_547	77048
scaffold_548	76974
scaffold_549	76929
scaffold_550	76318
scaffold_551	76194
scaffold_552	75985
scaffold_553	75768
scaffold_554	75678
scaffold_555	75599
scaffold_556	74810
scaffold_557	74716
scaffold_558	74634
scaffold_559	74205
scaffold_560	73858
scaffold_561	73724
scaffold_562	73454
scaffold_563	73431
scaffold_564	73398
scaffold_565	73249
scaffold_566	72945
scaffold_567	72939
scaffold_568	72749
scaffold_569	72707
scaffold_570	72700
scaffold_571	72622
scaffold_572	72602
scaffold_573	72436
scaffold_574	72118
scaffold_575	72084
scaffold_576	72069
scaffold_577	71682
scaffold_578	71406
scaffold_579	71354
scaffold_580	71329
scaffold_581	71243
scaffold_582	70886
scaffold_583	70742
scaffold_584	70700
scaffold_585	70698
scaffold_586	70674
scaffold_587	70502
scaffold_588	70452
scaffold_589	70354
scaffold_590	70208
scaffold_591	70155
scaffold_592	70014
scaffold_593	69911
scaffold_594	69189
scaffold_595	69186
scaffold_596	69130
scaffold_597	68822
scaffold_598	68655
scaffold_599	68009
scaffold_600	67635
scaffold_601	67541
scaffold_602	67474
scaffold_603	67452
scaffold_604	67436
scaffold_605	67423
scaffold_606	67416
scaffold_607	67399
scaffold_608	67228
scaffold_609	67178
scaffold_610	67166
scaffold_611	67143
scaffold_612	67071
scaffold_613	67041
scaffold_614	66911
scaffold_615	66790
scaffold_616	66774
scaffold_617	66683
scaffold_618	66629
scaffold_619	66496
scaffold_620	66311
scaffold_621	66265
scaffold_622	66173
scaffold_623	66101
scaffold_624	66088
scaffold_625	66010
scaffold_626	65977
scaffold_627	65972
scaffold_628	65946
scaffold_629	65890
scaffold_630	65791
scaffold_631	65671
scaffold_632	65658
scaffold_633	65578
scaffold_634	65485
scaffold_635	65448
scaffold_636	64920
scaffold_637	64613
scaffold_638	64234
scaffold_639	64214
scaffold_640	63898
scaffold_641	63845
scaffold_642	63713
scaffold_643	63630
scaffold_644	63458
scaffold_645	63321
scaffold_646	63290
scaffold_647	63170
scaffold_648	63163
scaffold_649	62912
scaffold_650	62871
scaffold_651	62707
scaffold_652	62700
scaffold_653	62623
scaffold_654	62587
scaffold_655	62098
scaffold_656	62029
scaffold_657	62018
scaffold_658	61710
scaffold_659	61444
scaffold_660	61409
scaffold_661	61341
scaffold_662	61281
scaffold_663	61258
scaffold_664	61116
scaffold_665	61072
scaffold_666	61047
scaffold_667	60915
scaffold_668	60896
scaffold_669	60844
scaffold_670	60723
scaffold_671	60651
scaffold_672	60642
scaffold_673	60606
scaffold_674	60570
scaffold_675	60207
scaffold_676	60200
scaffold_677	59960
scaffold_678	59675
scaffold_679	59573
scaffold_680	59547
scaffold_681	59506
scaffold_682	59301
scaffold_683	59231
scaffold_684	58603
scaffold_685	58597
scaffold_686	58357
scaffold_687	58139
scaffold_688	58127
scaffold_689	57917
scaffold_690	57910
scaffold_691	57535
scaffold_692	57454
scaffold_693	57248
scaffold_694	57225
scaffold_695	56962
scaffold_696	56888
scaffold_697	56834
scaffold_698	56830
scaffold_699	56779
scaffold_700	56563
scaffold_701	56454
scaffold_702	56112
scaffold_703	55963
scaffold_704	55916
scaffold_705	55839
scaffold_706	55752
scaffold_707	55746
scaffold_708	55627
scaffold_709	55603
scaffold_710	55572
scaffold_711	55464
scaffold_712	55305
scaffold_713	55279
scaffold_714	55274
scaffold_715	55234
scaffold_716	55069
scaffold_717	55048
scaffold_718	55044
scaffold_719	55016
scaffold_720	54878
scaffold_721	54873
scaffold_722	54714
scaffold_723	54680
scaffold_724	54655
scaffold_725	54428
scaffold_726	54417
scaffold_727	54275
scaffold_728	54234
scaffold_729	54173
scaffold_730	54164
scaffold_731	54053
scaffold_732	54009
scaffold_733	53954
scaffold_734	53943
scaffold_735	53784
scaffold_736	53666
scaffold_737	53569
scaffold_738	53540
scaffold_739	53387
scaffold_740	53228
scaffold_741	53193
scaffold_742	53072
scaffold_743	53063
scaffold_744	53050
scaffold_745	53007
scaffold_746	52941
scaffold_747	52814
scaffold_748	52744
scaffold_749	52707
scaffold_750	52678
scaffold_751	52616
scaffold_752	52577
scaffold_753	52574
scaffold_754	52552
scaffold_755	52449
scaffold_756	52441
scaffold_757	52385
scaffold_758	52338
scaffold_759	52256
scaffold_760	52151
scaffold_761	51777
scaffold_762	51766
scaffold_763	51699
scaffold_764	51592
scaffold_765	51523
scaffold_766	51503
scaffold_767	51491
scaffold_768	51406
scaffold_769	51318
scaffold_770	51302
scaffold_771	51223
scaffold_772	51210
scaffold_773	51014
scaffold_774	50994
scaffold_775	50960
scaffold_776	50882
scaffold_777	50843
scaffold_778	50842
scaffold_779	50828
scaffold_780	50810
scaffold_781	50761
scaffold_782	50643
scaffold_783	50614
scaffold_784	50485
scaffold_785	50387
scaffold_786	50378
scaffold_787	50374
scaffold_788	50217
scaffold_789	50205
scaffold_790	50136
scaffold_791	50028
scaffold_792	50021
scaffold_793	50004
scaffold_794	49974
scaffold_795	49928
scaffold_796	49836
scaffold_797	49590
scaffold_798	49581
scaffold_799	49560
scaffold_800	49538
scaffold_801	49330
scaffold_802	49294
scaffold_803	49188
scaffold_804	49076
scaffold_805	49013
scaffold_806	48905
scaffold_807	48896
scaffold_808	48893
scaffold_809	48819
scaffold_810	48776
scaffold_811	48593
scaffold_812	48305
scaffold_813	47922
scaffold_814	47783
scaffold_815	47738
scaffold_816	47711
scaffold_817	47672
scaffold_818	47463
scaffold_819	47202
scaffold_820	47074
scaffold_821	46864
scaffold_822	46705
scaffold_823	46704
scaffold_824	46699
scaffold_825	46581
scaffold_826	46536
scaffold_827	46502
scaffold_828	46496
scaffold_829	46462
scaffold_830	46447
scaffold_831	46316
scaffold_832	46176
scaffold_833	46049
scaffold_834	46014
scaffold_835	45940
scaffold_836	45842
scaffold_837	45576
scaffold_838	45518
scaffold_839	45457
scaffold_840	45439
scaffold_841	45346
scaffold_842	45307
scaffold_843	45209
scaffold_844	45133
scaffold_845	45032
scaffold_846	44905
scaffold_847	44634
scaffold_848	44591
scaffold_849	44585
scaffold_850	44487
scaffold_851	44464
scaffold_852	44338
scaffold_853	44034
scaffold_854	43803
scaffold_855	43792
scaffold_856	43764
scaffold_857	43723
scaffold_858	43642
scaffold_859	43364
scaffold_860	43180
scaffold_861	42857
scaffold_862	42712
scaffold_863	42707
scaffold_864	42692
scaffold_865	42559
scaffold_866	42183
scaffold_867	42070
scaffold_868	42030
scaffold_869	41926
scaffold_870	41275
scaffold_871	41206
scaffold_872	40937
scaffold_873	40830
scaffold_874	40536
scaffold_875	40506
scaffold_876	40363
scaffold_877	40355
scaffold_878	40299
scaffold_879	39974
scaffold_880	39872
scaffold_881	39817
scaffold_882	39594
scaffold_883	39515
scaffold_884	39405
scaffold_885	39375
scaffold_886	39338
scaffold_887	39315
scaffold_888	39029
scaffold_889	38916
scaffold_890	38859
scaffold_891	38664
scaffold_892	38572
scaffold_893	38371
scaffold_894	38311
scaffold_895	38263
scaffold_896	38236
scaffold_897	38003
scaffold_898	37893
scaffold_899	37569
scaffold_900	36806
scaffold_901	36369
scaffold_902	35923
scaffold_903	35345
scaffold_904	34502
scaffold_905	32735
scaffold_906	32709
scaffold_907	31915
scaffold_908	30918
scaffold_909	28300
scaffold_910	26333
scaffold_911	21575
scaffold_912	21575
scaffold_913	21339
scaffold_914	21198
scaffold_915	20778
scaffold_916	20663
scaffold_917	18939
scaffold_918	18911
scaffold_919	16956
